# Supplementary material for: Proton binding to humic nano particles: electrostatic interaction and the condensation approximation
Source: Royal Society of Chemistry journal article supplement (doi:10.1039/d1cp04470b), 2021-12-09
Supplement: d1cp04470b1.pdf [file d1cp04470b1.pdf]

## **Appendix A: Supplementary Data**

### **Proton binding to humic nano particles: Electrostatic interaction and the condensation approximation**

Luuk Koopal<sup>1</sup>, Juan Xiong<sup>2</sup>, Wenfeng Tan<sup>2</sup>, Takumi Saito<sup>3</sup>, Marcelo Avena<sup>4</sup>

<sup>1</sup> *Physical chemistry and Soft Matter, Wageningen University and Research, Wageningen, Netherlands*

<sup>2</sup> *College of Resources and Environment, Huazhong Agricultural University, Wuhan, PR China*

<sup>3</sup> *Nuclear Professional School, School of Engineering, the University of Tokyo, Ibaraki, Japan*

<sup>4</sup> *INQUISUR, Dep. Química, Universidad Nacional del Sur-CONICET, Bahía Blanca, Argentina*

## Master Curve coordinates

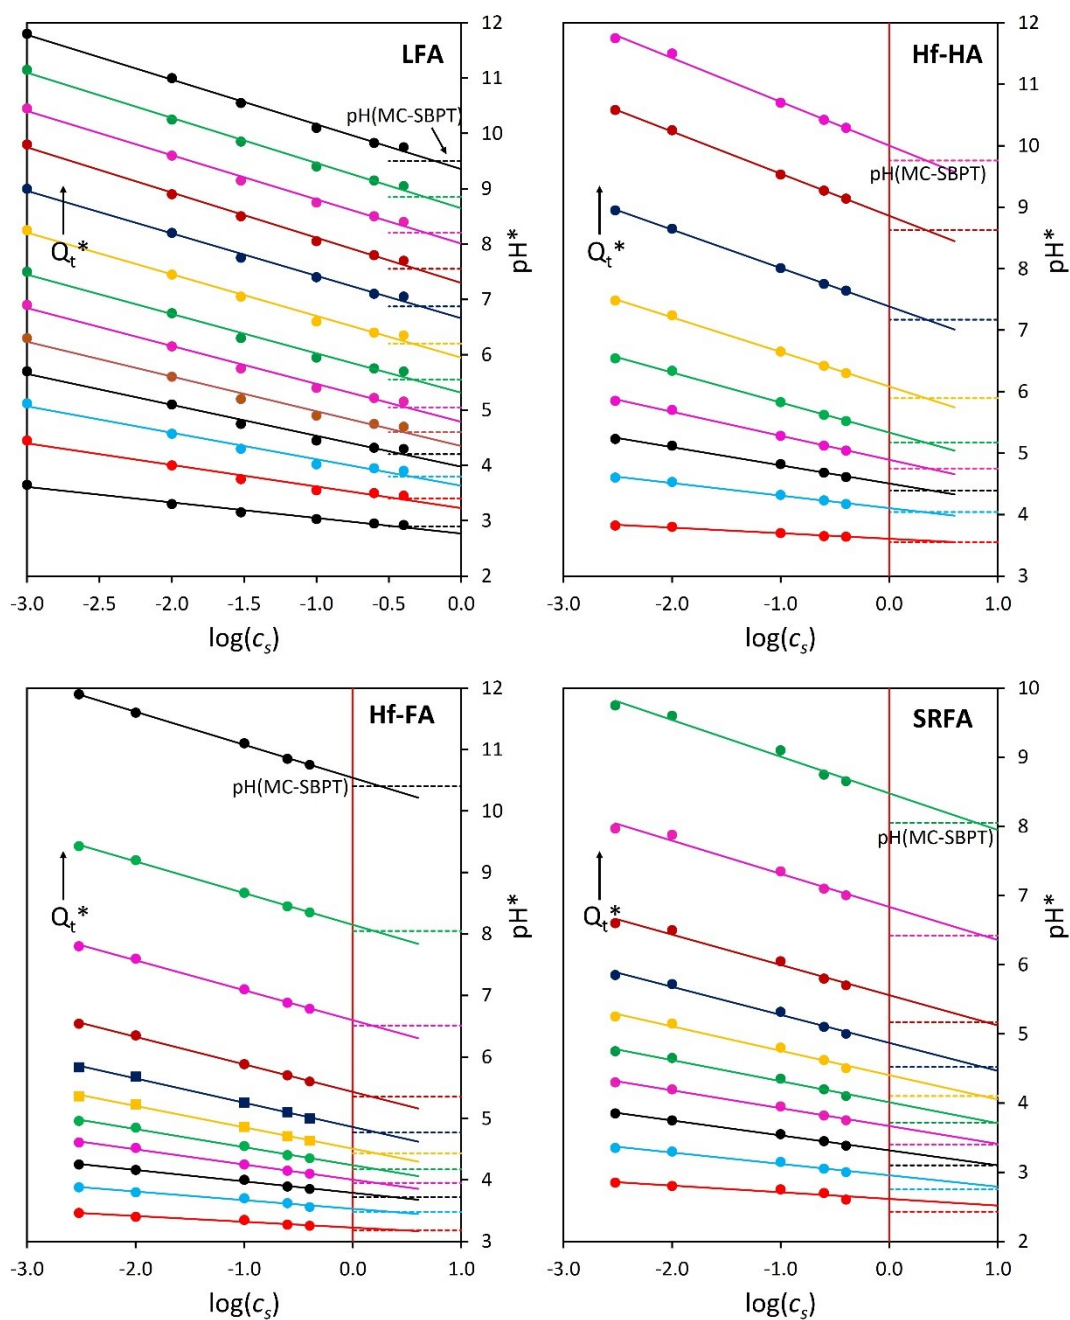

Fig.SI.1  $\text{pH}^*(c_s)$  vs.  $\log c_s$  at different  $Q_t^*$  for the indicated HNPs (LFA, Hf-HA, Hf-FA and SRFA). The horizontal dashed lines at different  $Q_t^*$  indicate the  $\{\text{pH}^*; (Q_t^*)\}$  coordinates of the MC-SPBT. The data points at  $\log c_s > -1.0$  are based on results calculated with the bi-LF-SPBT model to show a larger  $c_s$  range.
